# Supplementary material
Source: MDPI journal article supplement (https://www.mdpi.com/2075-163X/14/1/107)
Supplement: s1 [file s1]

```
FACTOR
/VARIABLES Al Fe M n Zn Cu M o U Ti M g K Sc Y Ba Ca
/MISSING LISTWISE
/ANALYSIS Al Fe M n Zn Cu M o U Ti M g K Sc Y Ba Ca
/PRINT INITIAL CORRELATION K M O EXTRACTION ROTATION FSCORE
/PLOT EIGEN ROTATION
/CRITERIA MINEIGEN(1) ITERATE(25)
/EXTRACTION PC
/CRITERIA ITERATE(25)
/ROTATION VAR IMAX
/SAVE REG(ALL)
/METHOD= CORRELATION .
```

26-JUN-2023 08:32:32

C:\Users\DeII\Desktop\

.sav

1

< >

< >

< >

1  
6

MISSING=EXCLUDE

LISTWISE

FACTOR

/VARIABLES Al Fe Mn Zn Cu Mo  
U Ti Mg K Sc Y Ba Ca

/MISSING LISTWISE

/ANALYSIS Al Fe Mn Zn Cu Mo  
U Ti Mg K Sc Y Ba Ca

/PRINT INITIAL  
CORRELATION KMO  
EXTRACTION ROTATION  
FSCORE

/PLOT EIGEN ROTATION

/CRITERIA MINEIGEN(1)

ITERATE(25)

/EXTRACTION PC

/CRITERIA ITERATE(25)

/ROTATION VARIMAX

/SAVE REG(ALL)

/METHOD=CORRELATION.

|        |                   |
|--------|-------------------|
|        | 00:00:02.45       |
|        | 00:00:00.63       |
| FAC1_1 | 26824 (26 . 195K) |
| FAC2_1 | 1                 |
| FAC3_1 | 2                 |
| FAC4_1 | 3                 |
|        | 4                 |

[1] C:\Users\Dell\Desktop\ . sav

|    | Al    | Fe    | Mn    | Zn    | Cu    | Mo    | U     | Ti    | Mg    | K     | Sc    | Y     | Ba    | Ca    |
|----|-------|-------|-------|-------|-------|-------|-------|-------|-------|-------|-------|-------|-------|-------|
| Al | 1.000 | .508  | .404  | .375  | .191  | .653  | .456  | .992  | .938  | .526  | .991  | .893  | .428  | .412  |
| Fe | .508  | 1.000 | .185  | .509  | .727  | .298  | .729  | .522  | .610  | .021  | .562  | .711  | .249  | .790  |
| Mn | .404  | .185  | 1.000 | .090  | .303  | .777  | .048  | .387  | .077  | .936  | .365  | .236  | .941  | .257  |
| Zn | .375  | .509  | .090  | 1.000 | .713  | .172  | .068  | .352  | .461  | .124  | .377  | .524  | .106  | .366  |
| Cu | .191  | .727  | .303  | .713  | 1.000 | .171  | .505  | .210  | .348  | .266  | .262  | .454  | .365  | .537  |
| Mo | .653  | .298  | .777  | .172  | .171  | 1.000 | .498  | .658  | .450  | .847  | .659  | .635  | .726  | .647  |
| U  | .456  | .729  | .048  | .068  | .505  | .498  | 1.000 | .490  | .529  | .122  | .527  | .575  | .094  | .702  |
| Ti | .992  | .522  | .387  | .352  | .210  | .658  | .490  | 1.000 | .935  | .511  | .995  | .899  | .410  | .421  |
| Mg | .938  | .610  | .077  | .461  | .348  | .450  | .529  | .935  | 1.000 | .239  | .943  | .871  | .120  | .349  |
| K  | .526  | .021  | .936  | .124  | .266  | .847  | .122  | .511  | .239  | 1.000 | .494  | .364  | .880  | .358  |
| Sc | .991  | .562  | .365  | .377  | .262  | .659  | .527  | .995  | .943  | .494  | 1.000 | .914  | .386  | .454  |
| Y  | .893  | .711  | .236  | .524  | .454  | .635  | .575  | .899  | .871  | .364  | .914  | 1.000 | .287  | .641  |
| Ba | .428  | .249  | .941  | .106  | .365  | .726  | .094  | .410  | .120  | .880  | .386  | .287  | 1.000 | .209  |
| Ca | .412  | .790  | .257  | .366  | .537  | .647  | .702  | .421  | .349  | .358  | .454  | .641  | .209  | 1.000 |

# K M O

|       |       |
|-------|-------|
| K M O | .5    |
|       | 73    |
|       | 368.6 |
|       | 71    |
|       | 9     |
|       | 1     |
|       | .00   |
|       | 0     |

| Al | 1.00<br>0 | .99<br>6 |
|----|-----------|----------|
| Fe | 1.00<br>0 | .91<br>4 |
| Mn | 1.00<br>0 | .97<br>3 |
| Zn | 1.00<br>0 | .97<br>3 |
| Cu | 1.00<br>0 | .89<br>1 |
| Mo | 1.00<br>0 | .94<br>1 |
| U  | 1.00<br>0 | .94<br>1 |
| Ti | 1.00<br>0 | .99<br>2 |
| Mg | 1.00<br>0 | .98<br>6 |
| K  | 1.00<br>0 | .94<br>9 |
| Sc | 1.00<br>0 | .99<br>4 |
| Y  | 1.00<br>0 | .92<br>9 |
| Ba | 1.00<br>0 | .94<br>9 |
| Ca | 1.00<br>0 | .92<br>8 |

|    |          |          | %           |           |           | %          |           |            | %          |
|----|----------|----------|-------------|-----------|-----------|------------|-----------|------------|------------|
| 1  | 7.       | 52.      | 52.         | 7.        | 52.       | 52.        | 4.        | 34.        | 34.        |
| 2  | 30       | 183      | 183         | 30        | 183       | 183        | 78        | 162        | 162        |
| 3  | 6        | 25.      | 78.         | 6         | 25.       | 78.        | 3         | 27.        | 61.        |
| 4  | 3.       | 820      | 003         | 3.        | 820       | 003        | 3.        | 658        | 819        |
| 5  | 61       | 10.      | 88.         | 61        | 10.       | 88.        | 87        | 20.        | 82.        |
| 6  | 5        | 193      | 196         | 5         | 193       | 196        | 2         | 801        | 620        |
| 7  | 1.       |          | 95.         | 1.        |           |            | 2.        |            |            |
| 8  | 42       | 7.       | 397         | 42        | 7.20<br>1 | 95.39<br>7 | 91        | 12.77<br>7 | 95.39<br>7 |
| 9  | 7        | 201      | 97.         | 7         |           |            | 2         |            |            |
| 10 | 1.       | 2.       | 480         |           |           |            |           |            |            |
| 11 | 00       | 083      | 98.         | 1.00<br>8 |           |            | 1.78<br>9 |            |            |
| 12 | 8        |          | 502         |           |           |            |           |            |            |
| 13 | .        | 1.       | 99.         |           |           |            |           |            |            |
| 14 | 29       | 023      | 209         |           |           |            |           |            |            |
|    | 2        |          | 99.         |           |           |            |           |            | -          |
|    | .        | .7       | 639         |           |           |            |           |            |            |
|    | 14       | 06       | 99.         |           |           |            |           |            |            |
|    | 3        |          | 865         |           |           |            |           |            |            |
|    | .        | .4       | 99.         |           |           |            |           |            |            |
|    | 09       | 30       | 945         |           |           |            |           |            |            |
|    | 9        |          | 99.         |           |           |            |           |            |            |
|    | .        | .2       | 978         |           |           |            |           |            |            |
|    | 06       | 27       | 99.         |           |           |            |           |            |            |
|    | 0        |          | 988         |           |           |            |           |            |            |
|    | .        | .0       | 99.         |           |           |            |           |            |            |
|    | 03       | 80       | 995         |           |           |            |           |            |            |
|    | 2        |          |             |           |           |            |           |            |            |
|    | .        | .0       | 100.00<br>0 |           |           |            |           |            |            |
|    | 01       | 33       |             |           |           |            |           |            |            |
|    | 1        |          |             |           |           |            |           |            |            |
|    | .        | .0       |             |           |           |            |           |            |            |
|    | 00       | 10       |             |           |           |            |           |            |            |
|    | 5        | .00      |             |           |           |            |           |            |            |
|    | .        | 7        |             |           |           |            |           |            |            |
|    | 00       |          |             |           |           |            |           |            |            |
|    | 1        | .00<br>5 |             |           |           |            |           |            |            |
|    | .0       |          |             |           |           |            |           |            |            |
|    | 01       |          |             |           |           |            |           |            |            |
|    | .00<br>1 |          |             |           |           |            |           |            |            |

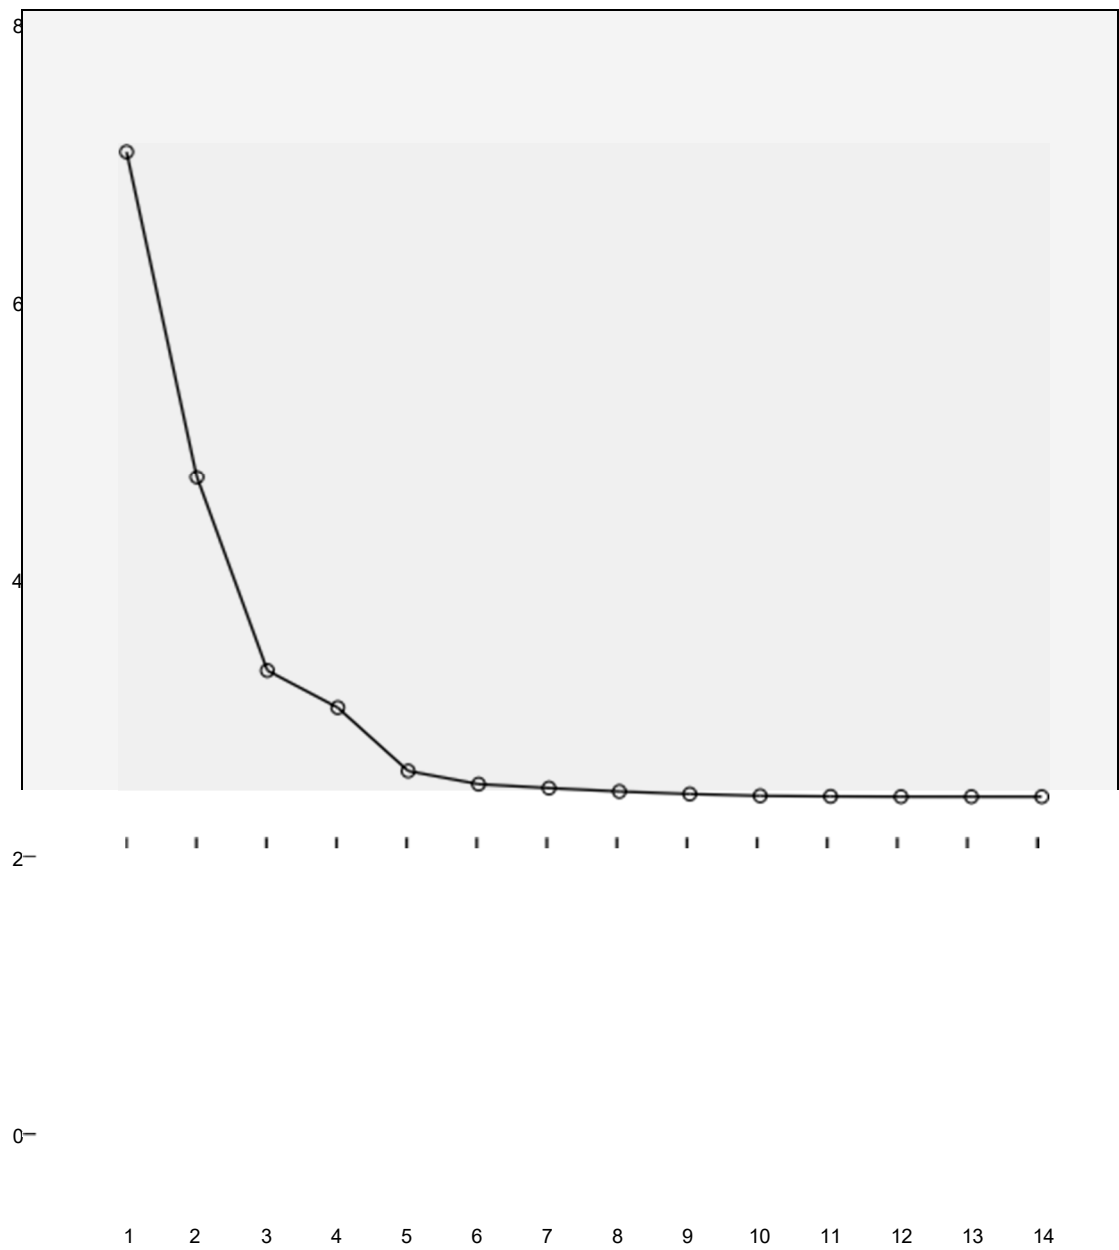

a

|    | 1   | 2   | 3  | 4   |
|----|-----|-----|----|-----|
| Al | .9  | -   | .  | .0  |
| Fe | 29  | .0  | 35 | 44  |
| Mn | -   | 76  | 3  | -   |
| Zn | .6  | -   | .  | .0  |
| Cu | 74  | .6  | 23 | 95  |
| Mo | -   | 28  | 8  | .   |
| U  | .4  | .   | .  | 18  |
| Ti | 45  | 83  | 20 | 1   |
| Mg | -   | 8   | 0  | .   |
| K  | .4  | -   | -  | 73  |
| Sc | 49  | .4  | .0 | 0   |
| Y  | -   | 84  | 70 | .   |
| Ba | .4  | -   | .  | 31  |
| Ca | 03  | .7  | 30 | 3   |
|    | -   | 32  | 8  | .   |
|    | .8  | .   | .  | 03  |
|    | 06  | 42  | 33 | 7-  |
|    | -   | 0   | 7  | .5  |
|    | .6  | -   | .  | 28  |
|    | 33  | .3  | 35 | .   |
|    | .   | 68  | 4  | 08  |
|    | 93  | -   | .  | 0   |
|    | 2   | .0  | 33 | .   |
|    | .   | 58  | 8  | 09  |
|    | 85  | .   | .  | 7   |
|    | 3-  | 22  | 44 | .   |
|    | .5  | 7   | 5  | 00  |
|    | 73  | .   | .  | 8   |
|    | .   | 76  | 18 | .   |
|    | 94  | 5   | 8  | 07  |
|    | 5   | -   | .  | 8-  |
|    | .   | .0  | 30 | .0  |
|    | 94  | 16  | 8  | 35  |
|    | 1-  | .   | .  | .17 |
|    | .4  | 17  | 11 | 2   |
|    | 36  | 1   | 9  | .00 |
|    | .69 | .8  | .0 | 9   |
|    | 7   | 50  | 85 |     |
|    |     | .19 | -  |     |

|  |  |   |      |  |
|--|--|---|------|--|
|  |  | 6 | .636 |  |
|--|--|---|------|--|

a. 4

a

|    | 1  | 2  | 3  | 4   |
|----|----|----|----|-----|
| Al | .9 | -  | -  | -   |
| Fe | 25 | .3 | .1 | .1  |
| Mn | -  | 20 | 60 | 13  |
| Zn | .4 | -  | .  | .   |
| Cu | 27 | .1 | 75 | 35  |
| Mo | -  | 82 | 7  | 4 - |
| U  | .1 | .  | -  | .0  |
| Ti | 10 | 97 | .0 | 55  |
| Mg | -  | 7  | 62 | .   |
| K  | .3 | -  | .  | 93  |
| Sc | 01 | .0 | 06 | 5   |
| Y  | -  | 67 | 4  | .   |
| Ba | .1 | -  | .  | 69  |
| Ca | 19 | .2 | 56 | 8   |
|    | -  | 62 | 6  | .   |
|    | .3 | .  | .  | 08  |
|    | 56 | 79 | 42 | 8 - |
|    | -  | 4  | 0  | .1  |
|    | .3 | -  | .  | 29  |



|  |     |      |      |      |
|--|-----|------|------|------|
|  | 75  | .0   | 88   | -    |
|  | .   | 47   | 4    | .0   |
|  | 92  | -    | -    | 91   |
|  | 5   | .3   | .1   | -    |
|  | .   | 03   | 94   | .1   |
|  | 95  | .    | -    | 62   |
|  | 8 - | 00   | .2   | -    |
|  | .2  | 2    | 03   | .1   |
|  | 49  | .    | .    | 48   |
|  | .   | 92   | 08   | -    |
|  | 91  | 6    | 4    | .1   |
|  | 9   | -    | -    | 16   |
|  | .   | .2   | .2   | -    |
|  | 79  | 84   | 36   | .3   |
|  | 4 - | -    | -    | 09   |
|  | .1  | .2   | .3   | -    |
|  | 76  | 16   | 97   | .082 |
|  | .14 | .9   | -    | -    |
|  | 4   | 43   | .1   | .301 |
|  |     | -    | 46   |      |
|  |     | .331 | -    |      |
|  |     |      | .841 |      |

a. 5

|   | 1        | 2        | 3        | 4        |
|---|----------|----------|----------|----------|
| 1 | .75<br>5 | -.412    | -.453    | -.235    |
| 2 | .08<br>3 | .82<br>0 | -.396    | -.405    |
| 3 | .62<br>8 | .32<br>5 | .69<br>9 | .10<br>3 |
| 4 | .16<br>7 | .22<br>9 | -.387    | .87<br>8 |

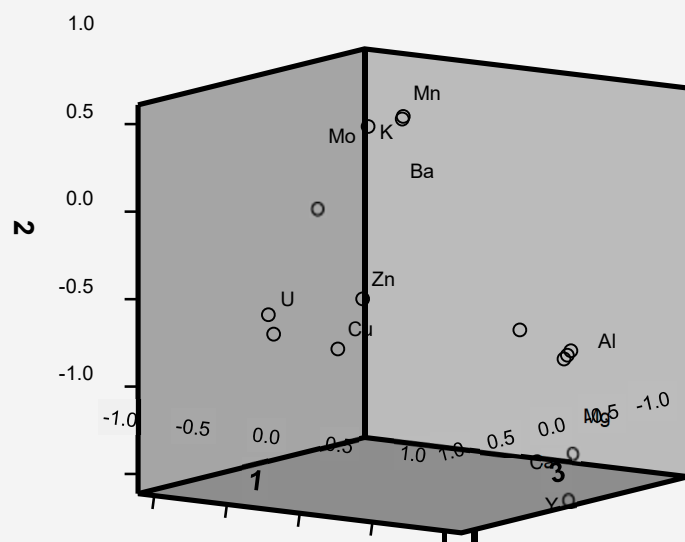

|    | 1     | 2    | 3  | 4    |
|----|-------|------|----|------|
| Al | .2    | .    | .  | .0   |
| Fe | 57    | 02   | 10 | 42   |
| Mn | .     | 1    | 7  | .    |
| Zn | 00    | -    | .  | 02   |
| Cu | 5     | .0   | 26 | 7    |
| Mo | .     | 72   | 4  | .    |
| U  | 09    | .    | -  | 09   |
| Ti | 1     | 30   | .0 | 3    |
| Mg | .     | 2    | 36 | .    |
| K  | 03    | .    | -  | 69   |
| Sc | 3     | 06   | .2 | 9    |
| Y  | .     | 6    | 33 | .    |
| Ba | 12    | -    | .  | 39   |
| Ca | 9     | .0   | 13 | 0    |
|    | .     | 02   | 6  | .    |
|    | 08    | .    | .  | 03   |
|    | 1 -   | 22   | 15 | 6 -  |
|    | .0    | 6    | 5  | .3   |
|    | 06    | -    | .  | 73   |
|    | .     | .0   | 45 | .    |
|    | 25    | 87   | 6  | 07   |
|    | 7     | .    | .  | 1    |
|    | .     | 03   | 08 | .    |
|    | 30    | 0    | 3  | 06   |
|    | 5     | .    | .  | 4 -  |
|    | .     | 12   | 10 | .0   |
|    | 04    | 7    | 3  | 47   |
|    | 2     | .    | .  | .    |
|    | .     | 25   | 04 | 06   |
|    | 24    | 0    | 0  | 1 -  |
|    | 6     | .    | .  | .0   |
|    | .     | 03   | 06 | 71   |
|    | 14    | 1    | 4  | .07  |
|    | 8     | .    | -  | 4    |
|    | .0    | 00   | .0 | -    |
|    | 40    | 5    | 05 | .082 |
|    | .     | .2   | -  |      |
|    | -.202 | 76   | .0 |      |
|    |       | -    | 90 |      |
|    |       | .138 | -  |      |

|  |  |  |      |  |
|--|--|--|------|--|
|  |  |  | .380 |  |
|--|--|--|------|--|

|   | 1         | 2         | 3         | 4         |
|---|-----------|-----------|-----------|-----------|
| 1 | 1.00<br>0 | .00<br>0  | .00<br>0  | .00<br>0  |
| 2 | .00<br>0  | 1.00<br>0 | .00<br>0  | .00<br>0  |
| 3 | .00<br>0  | .00<br>0  | 1.00<br>0 | .00<br>0  |
| 4 | .00<br>0  | .00<br>0  | .00<br>0  | 1.00<br>0 |
